# Supplementary material for: Trends in asthma hospital admissions and mortality in Kuwait, 2000–2014: a national retrospective observational study
Source: PubMed Central journal article supplement — BMJ Open. 2018 May 8;8(5):e021244. doi: 10.1136/bmjopen-2017-021244 (PMC5942427; doi:10.1136/bmjopen-2017-021244), 2018-05-08
Supplement: bmjopen-2017-021244supp001.pdf [file bmjopen-2017-021244supp001.pdf]

**Table S1.** Rates and rate ratios of hospital admissions for asthma comparing Kuwaiti and non-Kuwaiti individuals stratified by sex and age group in Kuwait, 2000 to 2014

|         | Age group (years) | Nationality | Number of hospital admissions for asthma | Average annual rate of hospital admissions per 100,000 population <sup>†</sup> (95% CI) | RR <sup>‡</sup> (95% CI) |                   |
|---------|-------------------|-------------|------------------------------------------|-----------------------------------------------------------------------------------------|--------------------------|-------------------|
| Males   | < 5               | Kuwaiti     | 8,318                                    | 733.5 (690.3, 779.4)                                                                    | 1.67 (1.49, 1.86)        |                   |
|         |                   | Non-Kuwaiti | 3,502                                    | 440.6 (401.4, 483.7)                                                                    | 1.00                     |                   |
|         | 5 – 19            | Kuwaiti     | 4,077                                    | 141.5 (131.7, 152.0)                                                                    | 1.80 (1.57, 2.06)        |                   |
|         |                   | Non-Kuwaiti | 1,535                                    | 78.8 (70.1, 88.4)                                                                       | 1.00                     |                   |
|         | 20 – 44           | Kuwaiti     | 1,061                                    | 40.0 (35.6, 44.9)                                                                       | 2.62 (2.27, 3.02)        |                   |
|         |                   | Non-Kuwaiti | 2,127                                    | 15.3 (14.0, 16.6)                                                                       | 1.00                     |                   |
|         | 45 – 64           | Kuwaiti     | 559                                      | 73.4 (61.4, 87.8)                                                                       | 1.82 (1.48, 2.25)        |                   |
|         |                   | Non-Kuwaiti | 1,510                                    | 40.3 (36.1, 44.9)                                                                       | 1.00                     |                   |
|         | ≥ 65              | Kuwaiti     | 720                                      | 319.9 (289.0, 354.0)                                                                    | 1.65 (1.39, 1.96)        |                   |
|         |                   | Non-Kuwaiti | 375                                      | 194.2 (168.9, 223.3)                                                                    | 1.00                     |                   |
|         | Total             | Kuwaiti     | 14,735                                   | 151.7 (143.9, 159.9)                                                                    | 1.81 (1.69, 1.94)        |                   |
|         |                   | Non-Kuwaiti | 9,049                                    | 83.7 (79.2, 88.5)                                                                       | 1.00                     |                   |
|         | Females           | < 5         | Kuwaiti                                  | 4,711                                                                                   | 431.5 (400.8, 464.5)     | 1.75 (1.52, 2.01) |
|         |                   |             | Non-Kuwaiti                              | 1,874                                                                                   | 246.5 (219.3, 277.0)     | 1.00              |
| 5 – 19  |                   | Kuwaiti     | 2,025                                    | 72.3 (66.5, 78.6)                                                                       | 1.36 (1.17, 1.57)        |                   |
|         |                   | Non-Kuwaiti | 941                                      | 53.2 (47.1, 60.1)                                                                       | 1.00                     |                   |
| 20 – 44 |                   | Kuwaiti     | 2,202                                    | 76.5 (67.4, 86.9)                                                                       | 2.50 (2.08, 3.01)        |                   |
|         |                   | Non-Kuwaiti | 1,903                                    | 30.6 (26.7, 35.0)                                                                       | 1.00                     |                   |
| 45 – 64 |                   | Kuwaiti     | 2,363                                    | 240.5 (217.1, 266.4)                                                                    | 2.27 (1.90, 2.70)        |                   |
|         |                   | Non-Kuwaiti | 1,239                                    | 106.1 (92.2, 122.2)                                                                     | 1.00                     |                   |
| ≥ 65    |                   | Kuwaiti     | 1,923                                    | 751.0 (683.1, 825.8)                                                                    | 1.33 (1.11, 1.59)        |                   |
|         |                   | Non-Kuwaiti | 687                                      | 566.5 (483.8, 663.4)                                                                    | 1.00                     |                   |
| Total   |                   | Kuwaiti     | 13,224                                   | 213.2 (202.2, 224.9)                                                                    | 1.88 (1.72, 2.06)        |                   |
|         |                   | Non-Kuwaiti | 6,644                                    | 113.4 (105.2, 122.3)                                                                    | 1.00                     |                   |

RR: rate ratio; CI: confidence interval.

<sup>†</sup> Average annual hospital admission rates for asthma per 100,000 population per year over the period from 2000 to 2014 were calculated using Poisson regression models.

<sup>‡</sup> Age- and sex- specific rate ratios comparing Kuwaiti to non-Kuwaiti individuals.
