# Supplementary material for: Trends in asthma hospital admissions and mortality in Kuwait, 2000–2014: a national retrospective observational study
Source: PubMed Central journal article supplement — BMJ Open. 2018 May 8;8(5):e021244. doi: 10.1136/bmjopen-2017-021244 (PMC5942427; doi:10.1136/bmjopen-2017-021244), 2018-05-08
Supplement: bmjopen-2017-021244supp002.pdf [file bmjopen-2017-021244supp002.pdf]

**Table S2.** Rates and rate ratios of asthma mortality comparing females to males according to age group in Kuwait, 2000 to 2014

| <b>Age group (years)</b> | <b>Sex</b> | <b>Average annual mortality rate per 100,000 population (95% CI)<sup>†</sup></b> | <b>RR<sup>‡</sup> (95% CI)</b> |
|--------------------------|------------|----------------------------------------------------------------------------------|--------------------------------|
| < 5                      | Female     | 1.7 (1.6, 1.8)                                                                   | 0.99 (0.89, 1.10)              |
|                          | Male       | 1.7 (1.6, 1.8)                                                                   | 1.00                           |
| 5 – 19                   | Female     | 1.0 (0.7, 1.6)                                                                   | 1.51 (0.98, 2.32)              |
|                          | Male       | 0.7 (0.5, 1.0)                                                                   | 1.00                           |
| 20 – 44                  | Female     | 0.8 (0.5, 1.1)                                                                   | 1.55 (1.10, 2.40)              |
|                          | Male       | 0.5 (0.4, 0.7)                                                                   | 1.00                           |
| 45 – 64                  | Female     | 3.0 (2.2, 4.0)                                                                   | 1.07 (0.73, 1.58)              |
|                          | Male       | 2.8 (2.2, 3.5)                                                                   | 1.00                           |
| ≥ 65                     | Female     | 38.0 (29.9, 48.2)                                                                | 1.50 (1.06, 2.12)              |
|                          | Male       | 25.3 (19.5, 32.9)                                                                | 1.00                           |

RR: rate ratio; CI: confidence interval.

<sup>†</sup> Model-adjusted average annual mortality rates due to asthma per 100,000 population per year over the period from 2000 to 2014 were calculated using Poisson regression models while adjusting for nationality.

<sup>‡</sup> Age-specific rate ratios comparing females to males while adjusting for nationality.
