# Supplementary material for: Trends in asthma hospital admissions and mortality in Kuwait, 2000–2014: a national retrospective observational study
Source: PubMed Central journal article supplement — BMJ Open. 2018 May 8;8(5):e021244. doi: 10.1136/bmjopen-2017-021244 (PMC5942427; doi:10.1136/bmjopen-2017-021244), 2018-05-08
Supplement: bmjopen-2017-021244supp003.pdf [file bmjopen-2017-021244supp003.pdf]

**Table S3.** Sex- and age-standardized rates and rate ratios of asthma hospital admissions in the total population and stratified by nationality in Kuwait, 2000 to 2014

| Year                       | Sex- and age-standardized asthma hospital admission rate per 100,000 population <sup>†</sup> (95% CI) |                      |                      |                          |
|----------------------------|-------------------------------------------------------------------------------------------------------|----------------------|----------------------|--------------------------|
|                            | Total                                                                                                 | Kuwaiti              | Non-Kuwaiti          | RR <sup>‡</sup> (95% CI) |
| 2000                       | 190.6 (181.6, 199.6)                                                                                  | 241.8 (228.8, 254.8) | 138.4 (124.5, 152.4) | 1.75 (1.56, 1.96)        |
| 2001                       | 221.3 (211.8, 230.7)                                                                                  | 278.6 (264.8, 292.3) | 156.3 (143.0, 169.6) | 1.78 (1.62, 1.97)        |
| 2002                       | 224.9 (215.7, 234.1)                                                                                  | 286.7 (273.1, 300.2) | 161.2 (147.8, 174.6) | 1.78 (1.62, 1.96)        |
| 2003                       | 175.2 (167.3, 183.1)                                                                                  | 215.5 (204.0, 226.9) | 143.0 (130.5, 155.6) | 1.51 (1.36, 1.67)        |
| 2004                       | 153.5 (146.5, 160.6)                                                                                  | 184.5 (174.3, 194.7) | 129.2 (117.9, 140.6) | 1.43 (1.29, 1.58)        |
| 2005                       | 162.8 (155.6, 169.9)                                                                                  | 194.7 (184.6, 204.9) | 135.4 (123.9, 146.9) | 1.44 (1.30, 1.59)        |
| 2006                       | 140.7 (134.1, 147.2)                                                                                  | 163.8 (154.5, 173.1) | 119.8 (109.4, 130.1) | 1.37 (1.23, 1.52)        |
| 2007                       | 107.0 (101.3, 112.6)                                                                                  | 138.6 (130.1, 147.1) | 75.5 (67.7, 83.3)    | 1.84 (1.63, 2.07)        |
| 2008                       | 103.9 (98.6, 109.2)                                                                                   | 134.1 (126.1, 142.1) | 74.5 (67.2, 81.8)    | 1.80 (1.61, 2.02)        |
| 2009                       | 107.2 (102.0, 112.3)                                                                                  | 136.7 (128.7, 144.7) | 79.4 (72.5, 86.4)    | 1.72 (1.55, 1.91)        |
| 2010                       | 106.3 (101.3, 111.3)                                                                                  | 141.8 (134.0, 149.5) | 72.2 (65.6, 78.8)    | 1.96 (1.77, 2.18)        |
| 2011                       | 127.1 (121.6, 132.6)                                                                                  | 166.6 (158.0, 175.2) | 88.8 (81.6, 95.9)    | 1.88 (1.71, 2.07)        |
| 2012                       | 118.3 (113.1, 123.5)                                                                                  | 152.5 (144.5, 160.5) | 84.2 (77.3, 91.1)    | 1.81 (1.64, 2.00)        |
| 2013                       | 120.7 (115.6, 125.9)                                                                                  | 158.0 (150.1, 166.0) | 84.4 (77.4, 91.4)    | 1.87 (1.70, 2.06)        |
| 2014                       | 93.7 (89.3, 98.2)                                                                                     | 126.0 (119.0, 133.0) | 63.6 (57.8, 69.4)    | 1.98 (1.78, 2.20)        |
| <b>Average<sup>¶</sup></b> | 136.3 (134.7, 137.9)                                                                                  | 175.3 (172.9, 177.8) | 98.8 (96.6, 101.1)   | 1.77 (1.73, 1.82)        |

RR: rate ratio; CI: confidence interval.

<sup>†</sup> Asthma hospital admission rates per 100,000 population were sex- and age-standardized to the World Health Organization Standard Population.

<sup>‡</sup> Rate ratios comparing sex- and age-standardized hospital admission rates among Kuwaiti to non-Kuwaiti subjects.

<sup>¶</sup> Average annual sex- and age-standardized asthma hospital admission rates per 100,000 population per year over the period from 2000 to 2014.
